# Supplementary material for: Sandwich-like titania thin films with one/three-dimensional nanostructures for photocatalytic applications
Source: Royal Society of Chemistry journal article supplement (doi:10.1039/c4ra01806k), 2014-01-01
Supplement: c4ra01806k1.pdf [file c4ra01806k1.pdf]

## Supporting Information for

# Sandwich-like Titania Thin Films with One/Three-Dimensional Nanostructures for Photocatalytic Applications

By

Ming-Zao Tang and Jin-Ming Wu\*

The average grain size  $d_{hkl}$  and the fraction of anatase  $w_A = 1 - w_R$  as listed in Table 1 were estimated from the corresponding XRD patterns using the followed Eq. (1) and Eq. (2), respectively.

$$d_{hkl} = k\lambda / (B \cos(2\theta)) \quad \text{Eq. (1)}$$

$$w_R = 1 / (1 + 0.8 I_A / I_R) \quad \text{Eq. (2)}$$

In Eq. (1),<sup>1</sup>  $\lambda$  is the wavelength of the Cu K $\alpha$  radiation,  $\theta$  the Bragg's diffraction angle,  $B$  the full width at half maximum intensity of the peak, and  $k = 0.94$ . In Eq. (2),<sup>2</sup>  $I_A$  and  $I_R$  are X-ray integrated intensities of the (101) peaks of anatase and rutile, respectively.

### References

1. E. Sanchez and T. Lopez, *Mater. Lett.*, 1995, **25**, 271.
2. R.A. Spurr and H. Myers, *Anal. Chem.*, 1957, **29**, 760.

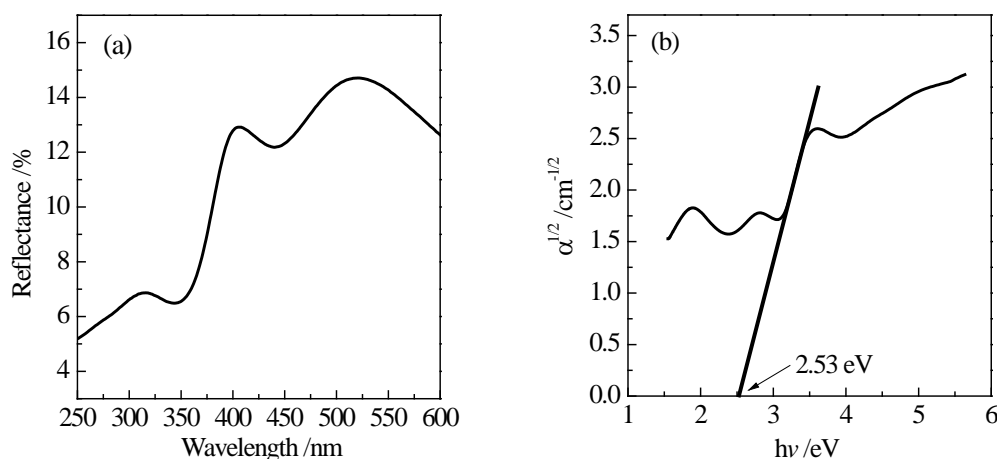

**Figure S1** (a) UV-vis diffuse reflectance spectra of rutile nanoflowers precipitated on sol-gel anatase layer (SG/NF). (b) Re-plotting of (a) in the  $\alpha^{1/2} \sim hv$  coordinate to evaluate the corresponding band gap, assuming an indirect transition between bands for titania.

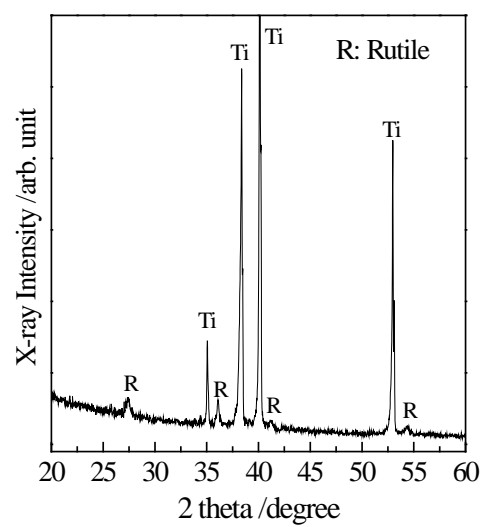

**Figure S2** XRD patterns of rutile nanoflowers precipitated on sol-gel anatase layer (SG/NF).
